# Supplementary material
Source: publisher figshare collection journal article supplement (https://acs.figshare.com/ndownloader/files/4481215)
Supplement: Supplementary file 1 [file 4481215]

# Ms. No.:   ?
#
# Title:     An in-Ketocyclophane
#
# Authors:   Qian Qin, Joel T. Mague, and Robert A. Pascal, Jr.
#            
# Contents:  This file (rp006_0m.cif) contains CIF data for cyclophane 4
#             
#=======================================================================
data_global
#=======================================================================
_audit_creation_date              'July 19, 2009'
_audit_creation_method
;
 SHELXL-97 and manual editing
;
_audit_update_record
;
 July 19, 2009  rp008.cif         Initial CIF created by JTM.

 Dec. 6, 2009   Sent to CheckCIF  See rp008_checkcif.pdf for alerts that  
                                  were generated. Comments on these
                                  alerts are given below.
------------------------------------------------------------------------
                ALERT level A = In general: serious problem
                ALERT level B = Potentially serious problem
                ALERT level C = Check and explain
                ALERT level G = General alerts; check
------------------------------------------------------------------------
PLAT230_ALERT_2_B Hirshfeld Test Diff for S1 -- O2  ...          8.99 su

Comment/Explanation:
            The thermal ellipsoids appear to be normal. The oxygen is
            simply a more highly mobile terminal atom.
;
#=======================================================================
data_rp008 
#=======================================================================
_chemical_name_systematic         ?
_chemical_name_common             ? 
_chemical_melting_point           ? 
_chemical_formula_moiety          'C23 H20 O5 S2' 
_chemical_formula_sum             'C23 H20 O5 S2' 
_chemical_formula_weight          440.51 
  
loop_ 
 _atom_type_symbol 
 _atom_type_description 
 _atom_type_scat_dispersion_real 
 _atom_type_scat_dispersion_imag 
 _atom_type_scat_source 
 'C'  'C'   0.0033   0.0016 
 'International Tables Vol C Tables 4.2.6.8 and 6.1.1.4' 
 'H'  'H'   0.0000   0.0000 
 'International Tables Vol C Tables 4.2.6.8 and 6.1.1.4' 
 'O'  'O'   0.0106   0.0060 
 'International Tables Vol C Tables 4.2.6.8 and 6.1.1.4' 
 'S'  'S'   0.1246   0.1234 
 'International Tables Vol C Tables 4.2.6.8 and 6.1.1.4' 
  
_symmetry_cell_setting            Monoclinic 
_symmetry_space_group_name_H-M    C2/c 
_symmetry_space_group_name_Hall   '-C 2yc'
  
loop_ 
 _symmetry_equiv_pos_as_xyz 
 'x, y, z' 
 '-x, y, -z+1/2' 
 'x+1/2, y+1/2, z' 
 '-x+1/2, y+1/2, -z+1/2' 
 '-x, -y, -z' 
 'x, -y, z-1/2' 
 '-x+1/2, -y+1/2, -z' 
 'x+1/2, -y+1/2, z-1/2' 
  
_cell_length_a                    20.0117(15) 
_cell_length_b                    10.0091(9) 
_cell_length_c                    10.6634(9) 
_cell_angle_alpha                 90.00 
_cell_angle_beta                  115.921(2) 
_cell_angle_gamma                 90.00 
_cell_volume                      1921.0(3) 
_cell_formula_units_Z             4 
_cell_measurement_temperature     100(2) 
_cell_measurement_reflns_used     9335 
_cell_measurement_theta_min       2.33 
_cell_measurement_theta_max       28.74 
  
_exptl_crystal_description        Block 
_exptl_crystal_colour             colourless 
_exptl_crystal_size_max           0.18 
_exptl_crystal_size_mid           0.12 
_exptl_crystal_size_min           0.12 
_exptl_crystal_density_meas       ? 
_exptl_crystal_density_diffrn     1.523 
_exptl_crystal_density_method     'not measured' 
_exptl_crystal_F_000              920 
_exptl_absorpt_coefficient_mu     0.313 
_exptl_absorpt_correction_type    multi-scan 
_exptl_absorpt_correction_T_min   0.8928 
_exptl_absorpt_correction_T_max   0.9649 
_exptl_absorpt_process_details    'SADABS (Sheldrick, 2008a)' 
  
_exptl_special_details 
; 
 The diffraction data were obtained from 3 sets of 400 frames,
 each of width 0.5 deg. in omega, colllected at phi = 0.00,
 90.00 and 180.00 deg. and 2 sets of 800 frames, each of
 width 0.45 deg in phi, collected at omega = -30.00 and 210.00
 deg. The scan time was 20 sec/frame.
; 
  
_diffrn_ambient_temperature       100(2) 
_diffrn_radiation_wavelength      0.71073 
_diffrn_radiation_type            MoK\a 
_diffrn_radiation_source          'fine-focus sealed tube' 
_diffrn_radiation_monochromator   graphite 
_diffrn_measurement_device_type   'Bruker APEX-I CCD' 
_diffrn_measurement_method        '\f and \w scans' 
_diffrn_detector_area_resol_mean  ? 
_diffrn_reflns_number             16589 
_diffrn_reflns_av_R_equivalents   0.0377 
_diffrn_reflns_av_sigmaI/netI     0.0225 
_diffrn_reflns_limit_h_min        -26 
_diffrn_reflns_limit_h_max        26 
_diffrn_reflns_limit_k_min        -13 
_diffrn_reflns_limit_k_max        13 
_diffrn_reflns_limit_l_min        -14 
_diffrn_reflns_limit_l_max        14 
_diffrn_reflns_theta_min          2.26 
_diffrn_reflns_theta_max          28.78 
_reflns_number_total              2478 
_reflns_number_gt                 2153 
_reflns_threshold_expression      >2sigma(I) 
  
_computing_data_collection        'Bruker APEX2 (Bruker-AXS, 2009)' 
_computing_cell_refinement        'Bruker SAINT (Bruker-AXS 2008)' 
_computing_data_reduction         'Bruker SAINT (Bruker-AXS 2008)' 
_computing_structure_solution     'SHELXS (Sheldrick, 2008)' 
_computing_structure_refinement   'SHELXL (Sheldrick, 2008)' 
_computing_molecular_graphics     'Bruker SHELXTL(Bruker-AXS 2008a)' 
_computing_publication_material   'Bruker SHELXTL(Bruker-AXS 2008a)' 

_publ_section_references
;
Bruker-AXS (2009). APEX2, Version 2009.5-1, Madison, WI.

Bruker-AXS (2008). SAINT, Version 7.60A, Madison, WI

Bruker-AXS (2008a). SHELXTL, Version 2008/4, Madison, WI

Sheldrick, G. M. (2008). SHELXS and SHELXL. Acta Cryst. A64,
112-122.

Sheldrick, G, M. (2008a). SADABS, Version 2008/2. University 
of G\"ottingen, Germany.
;
  
_refine_special_details 
; 
 Refinement of F^2^ against ALL reflections.  The weighted R-factor wR and 
 goodness of fit S are based on F^2^, conventional R-factors R are based 
 on F, with F set to zero for negative F^2^. The threshold expression of 
 F^2^ > 2sigma(F^2^) is used only for calculating R-factors(gt) etc. and is 
 not relevant to the choice of reflections for refinement.  R-factors based 
 on F^2^ are statistically about twice as large as those based on F, and R- 
 factors based on ALL data will be even larger. H-atoms were placed in
 calculated positions (C---H = 0.95 - 0.99 \%A) and included as riding
 contributions with isotropic displacement parameters 1.2 times those
 of the attached carbon atoms.
; 
  
_refine_ls_structure_factor_coef  Fsqd 
_refine_ls_matrix_type            full 
_refine_ls_weighting_scheme       calc 
_refine_ls_weighting_details 
 'calc w=1/[\s^2^(Fo^2^)+(0.0545P)^2^+3.9347P] where P=(Fo^2^+2Fc^2^)/3' 
_atom_sites_solution_primary      direct 
_atom_sites_solution_secondary    difmap 
_atom_sites_solution_hydrogens    geom 
_refine_ls_hydrogen_treatment     constr 
_refine_ls_extinction_method      none 
_refine_ls_extinction_coef        ? 
_refine_ls_number_reflns          2478 
_refine_ls_number_parameters      137 
_refine_ls_number_restraints      0 
_refine_ls_R_factor_all           0.0482 
_refine_ls_R_factor_gt            0.0408 
_refine_ls_wR_factor_ref          0.1149 
_refine_ls_wR_factor_gt           0.1090 
_refine_ls_goodness_of_fit_ref    1.059 
_refine_ls_restrained_S_all       1.059 
_refine_ls_shift/su_max           0.000 
_refine_ls_shift/su_mean          0.000 
  
loop_ 
 _atom_site_label 
 _atom_site_type_symbol 
 _atom_site_fract_x 
 _atom_site_fract_y 
 _atom_site_fract_z 
 _atom_site_U_iso_or_equiv 
 _atom_site_adp_type 
 _atom_site_occupancy 
 _atom_site_symmetry_multiplicity 
 _atom_site_calc_flag 
 _atom_site_refinement_flags 
 _atom_site_disorder_assembly 
 _atom_site_disorder_group 
S1 S 0.17217(2) 0.37949(4) 1.01335(5) 0.01815(14) Uani 1 1 d . . . 
O1 O 0.24087(8) 0.38759(14) 1.13969(16) 0.0280(3) Uani 1 1 d . . . 
O2 O 0.17702(9) 0.41261(16) 0.88889(17) 0.0319(3) Uani 1 1 d . . . 
O3 O 0.0000 0.47833(19) 0.7500 0.0254(4) Uani 1 2 d S . . 
C1 C 0.10476(9) 0.48676(17) 1.03390(18) 0.0170(3) Uani 1 1 d . . . 
H1A H 0.0539 0.4525 0.9778 0.020 Uiso 1 1 calc R . . 
H1B H 0.1140 0.4896 1.1330 0.020 Uiso 1 1 calc R . . 
C2 C 0.11283(9) 0.62464(17) 0.98476(18) 0.0155(3) Uani 1 1 d . . . 
C3 C 0.17191(9) 0.70253(18) 1.07593(18) 0.0182(3) Uani 1 1 d . . . 
H3 H 0.2014 0.6711 1.1679 0.022 Uiso 1 1 calc R . . 
C4 C 0.18863(10) 0.82491(18) 1.03531(19) 0.0202(4) Uani 1 1 d . . . 
H4 H 0.2293 0.8761 1.0988 0.024 Uiso 1 1 calc R . . 
C5 C 0.14574(10) 0.87211(18) 0.90178(19) 0.0191(4) Uani 1 1 d . . . 
H5 H 0.1586 0.9532 0.8714 0.023 Uiso 1 1 calc R . . 
C6 C 0.08390(9) 0.80016(17) 0.81263(18) 0.0173(3) Uani 1 1 d . . . 
H6 H 0.0529 0.8356 0.7232 0.021 Uiso 1 1 calc R . . 
C7 C 0.06623(9) 0.67622(17) 0.85173(17) 0.0152(3) Uani 1 1 d . . . 
C8 C 0.0000 0.6001(2) 0.7500 0.0167(5) Uani 1 2 d S . . 
C9 C 0.13596(9) 0.21307(17) 1.00526(18) 0.0171(3) Uani 1 1 d . . . 
H9A H 0.1737 0.1472 1.0092 0.021 Uiso 1 1 calc R . . 
H9B H 0.1259 0.1981 1.0872 0.021 Uiso 1 1 calc R . . 
C10 C 0.06562(9) 0.19124(17) 0.87413(17) 0.0159(3) Uani 1 1 d . . . 
C11 C 0.06839(9) 0.18561(17) 0.74584(18) 0.0171(3) Uani 1 1 d . . . 
H11 H 0.1151 0.1813 0.7427 0.020 Uiso 1 1 calc R . . 
C12 C 0.00327(9) 0.18630(17) 0.62282(18) 0.0172(3) Uani 1 1 d . . . 
H12 H 0.0056 0.1834 0.5358 0.021 Uiso 1 1 calc R . . 
  
loop_ 
 _atom_site_aniso_label 
 _atom_site_aniso_U_11 
 _atom_site_aniso_U_22 
 _atom_site_aniso_U_33 
 _atom_site_aniso_U_23 
 _atom_site_aniso_U_13 
 _atom_site_aniso_U_12 
S1 0.0123(2) 0.0172(2) 0.0240(2) 0.00330(15) 0.00692(17) 0.00186(14) 
O1 0.0158(6) 0.0252(7) 0.0314(8) 0.0021(6) -0.0005(6) 0.0010(5) 
O2 0.0330(8) 0.0319(8) 0.0344(8) -0.0002(6) 0.0181(7) -0.0002(6) 
O3 0.0242(10) 0.0170(9) 0.0233(10) 0.000 -0.0003(8) 0.000 
C1 0.0144(7) 0.0200(8) 0.0166(8) 0.0017(6) 0.0068(6) 0.0025(6) 
C2 0.0136(7) 0.0177(8) 0.0160(8) -0.0012(6) 0.0072(6) 0.0016(6) 
C3 0.0145(7) 0.0220(8) 0.0158(8) -0.0032(6) 0.0046(6) 0.0016(6) 
C4 0.0153(8) 0.0207(8) 0.0229(9) -0.0073(7) 0.0069(7) -0.0015(6) 
C5 0.0170(8) 0.0167(8) 0.0242(9) -0.0018(6) 0.0096(7) -0.0003(6) 
C6 0.0162(8) 0.0179(8) 0.0177(8) -0.0006(6) 0.0073(7) 0.0008(6) 
C7 0.0130(7) 0.0165(8) 0.0160(8) -0.0024(6) 0.0062(6) 0.0008(6) 
C8 0.0140(11) 0.0181(11) 0.0160(11) 0.000 0.0049(9) 0.000 
C9 0.0149(7) 0.0173(8) 0.0171(8) 0.0019(6) 0.0051(6) 0.0014(6) 
C10 0.0151(8) 0.0142(7) 0.0168(8) 0.0012(6) 0.0056(6) 0.0017(6) 
C11 0.0145(7) 0.0184(8) 0.0198(8) 0.0005(6) 0.0089(6) 0.0007(6) 
C12 0.0178(8) 0.0191(8) 0.0168(8) -0.0007(6) 0.0097(7) 0.0000(6) 
  
_geom_special_details 
; 
 All esds (except the esd in the dihedral angle between two l.s. planes) 
 are estimated using the full covariance matrix.  The cell esds are taken 
 into account individually in the estimation of esds in distances, angles 
 and torsion angles; correlations between esds in cell parameters are only 
 used when they are defined by crystal symmetry.  An approximate (isotropic) 
 treatment of cell esds is used for estimating esds involving l.s. planes. 
; 
  
loop_ 
 _geom_bond_atom_site_label_1 
 _geom_bond_atom_site_label_2 
 _geom_bond_distance 
 _geom_bond_site_symmetry_2 
 _geom_bond_publ_flag 
S1 O2 1.4119(16) . ? 
S1 O1 1.4464(14) . ? 
S1 C9 1.8035(18) . ? 
S1 C1 1.8107(17) . ? 
O3 C8 1.219(3) . ? 
C1 C2 1.510(2) . ? 
C1 H1A 0.9900 . ? 
C1 H1B 0.9900 . ? 
C2 C3 1.395(2) . ? 
C2 C7 1.411(2) . ? 
C3 C4 1.388(3) . ? 
C3 H3 0.9500 . ? 
C4 C5 1.385(3) . ? 
C4 H4 0.9500 . ? 
C5 C6 1.388(2) . ? 
C5 H5 0.9500 . ? 
C6 C7 1.402(2) . ? 
C6 H6 0.9500 . ? 
C7 C8 1.502(2) . ? 
C9 C10 1.505(2) . ? 
C9 H9A 0.9900 . ? 
C9 H9B 0.9900 . ? 
C10 C12 1.394(2) 2_556 ? 
C10 C11 1.394(2) . ? 
C11 C12 1.387(2) . ? 
C11 H11 0.9500 . ? 
C12 H12 0.9500 . ? 
  
loop_ 
 _geom_angle_atom_site_label_1 
 _geom_angle_atom_site_label_2 
 _geom_angle_atom_site_label_3 
 _geom_angle 
 _geom_angle_site_symmetry_1 
 _geom_angle_site_symmetry_3 
 _geom_angle_publ_flag 
O2 S1 O1 115.75(9) . . ? 
O2 S1 C9 111.29(9) . . ? 
O1 S1 C9 107.14(8) . . ? 
O2 S1 C1 109.61(9) . . ? 
O1 S1 C1 108.00(9) . . ? 
C9 S1 C1 104.39(8) . . ? 
C2 C1 S1 107.56(11) . . ? 
C2 C1 H1A 110.2 . . ? 
S1 C1 H1A 110.2 . . ? 
C2 C1 H1B 110.2 . . ? 
S1 C1 H1B 110.2 . . ? 
H1A C1 H1B 108.5 . . ? 
C3 C2 C7 118.85(16) . . ? 
C3 C2 C1 117.10(15) . . ? 
C7 C2 C1 124.00(15) . . ? 
C4 C3 C2 121.48(16) . . ? 
C4 C3 H3 119.3 . . ? 
C2 C3 H3 119.3 . . ? 
C5 C4 C3 119.75(16) . . ? 
C5 C4 H4 120.1 . . ? 
C3 C4 H4 120.1 . . ? 
C4 C5 C6 119.57(17) . . ? 
C4 C5 H5 120.2 . . ? 
C6 C5 H5 120.2 . . ? 
C5 C6 C7 121.38(16) . . ? 
C5 C6 H6 119.3 . . ? 
C7 C6 H6 119.3 . . ? 
C6 C7 C2 118.73(15) . . ? 
C6 C7 C8 119.44(15) . . ? 
C2 C7 C8 121.80(15) . . ? 
O3 C8 C7 120.48(10) . . ? 
C7 C8 C7 119.0(2) 2_556 . ? 
C10 C9 S1 111.82(12) . . ? 
C10 C9 H9A 109.3 . . ? 
S1 C9 H9A 109.3 . . ? 
C10 C9 H9B 109.3 . . ? 
S1 C9 H9B 109.3 . . ? 
H9A C9 H9B 107.9 . . ? 
C12 C10 C11 119.04(15) 2_556 . ? 
C12 C10 C9 121.10(15) 2_556 . ? 
C11 C10 C9 119.69(15) . . ? 
C12 C11 C10 120.24(15) . . ? 
C12 C11 H11 119.9 . . ? 
C10 C11 H11 119.9 . . ? 
C11 C12 C10 120.53(16) . 2_556 ? 
C11 C12 H12 119.7 . . ? 
C10 C12 H12 119.7 2_556 . ? 
  
loop_ 
 _geom_torsion_atom_site_label_1 
 _geom_torsion_atom_site_label_2 
 _geom_torsion_atom_site_label_3 
 _geom_torsion_atom_site_label_4 
 _geom_torsion 
 _geom_torsion_site_symmetry_1 
 _geom_torsion_site_symmetry_2 
 _geom_torsion_site_symmetry_3 
 _geom_torsion_site_symmetry_4 
 _geom_torsion_publ_flag 
O2 S1 C1 C2 -38.40(14) . . . . ? 
O1 S1 C1 C2 88.51(13) . . . . ? 
C9 S1 C1 C2 -157.70(11) . . . . ? 
S1 C1 C2 C3 -78.38(17) . . . . ? 
S1 C1 C2 C7 99.20(17) . . . . ? 
C7 C2 C3 C4 -4.4(3) . . . . ? 
C1 C2 C3 C4 173.33(15) . . . . ? 
C2 C3 C4 C5 0.4(3) . . . . ? 
C3 C4 C5 C6 3.7(3) . . . . ? 
C4 C5 C6 C7 -3.9(3) . . . . ? 
C5 C6 C7 C2 -0.1(3) . . . . ? 
C5 C6 C7 C8 -178.16(15) . . . . ? 
C3 C2 C7 C6 4.1(2) . . . . ? 
C1 C2 C7 C6 -173.40(15) . . . . ? 
C3 C2 C7 C8 -177.82(14) . . . . ? 
C1 C2 C7 C8 4.6(2) . . . . ? 
C6 C7 C8 O3 147.82(12) . . . . ? 
C2 C7 C8 O3 -30.19(17) . . . . ? 
C6 C7 C8 C7 -32.18(12) . . . 2_556 ? 
C2 C7 C8 C7 149.80(17) . . . 2_556 ? 
O2 S1 C9 C10 -50.20(15) . . . . ? 
O1 S1 C9 C10 -177.66(12) . . . . ? 
C1 S1 C9 C10 67.95(14) . . . . ? 
S1 C9 C10 C12 -106.09(17) . . . 2_556 ? 
S1 C9 C10 C11 69.13(18) . . . . ? 
C12 C10 C11 C12 5.3(2) 2_556 . . . ? 
C9 C10 C11 C12 -170.02(16) . . . . ? 
C10 C11 C12 C10 -0.7(2) . . . 2_556 ? 
  
_diffrn_measured_fraction_theta_max    0.989 
_diffrn_reflns_theta_full              28.78 
_diffrn_measured_fraction_theta_full   0.989 
_refine_diff_density_max    0.446 
_refine_diff_density_min   -0.663 
_refine_diff_density_rms    0.070 

#=========================== END DATA_rp008 ============================
# The following lines are used to test the character set of files sent
# by email or other means.  They are not part of the CIF data set.
# abcdefghijklmnopqrstuvwxyzABCDEFGHIJKLMNOPQRSTUVWXYZ0123456789
# !@#$%^&*()_+{}:"~<>?|\-=[];'`,./
#=======================================================================
#                              END of CIF
#=======================================================================
